# Supplementary material
Source: PubMed Central journal article supplement (PMC9204779)
Supplement: NIHMS1791050-supplement-Table_1.pdf [file NIHMS1791050-supplement-Table_1.pdf]

**Supplementary Table 1.** Participant demographics from Project #2: *Connecting resources for rural and urban sexual health—CRRUSH-Sacramento*

| <b>Semi-structured interview participants</b> |          |
|-----------------------------------------------|----------|
| <b>(N=22)</b>                                 |          |
| <b>Race/Ethnicity</b>                         |          |
| Hispanic                                      | 13 (59%) |
| Black/ African American                       | 8 (36%)  |
| White                                         | 7 (32%)  |
| Multiracial                                   | 7 (32%)  |
| <b>Gender Identity</b>                        |          |
| Cis Male                                      | 12 (55%) |
| Cis Female*                                   | 2 (9%)   |
| Trans Male                                    | 2 (9%)   |
| Trans Female                                  | 1 (4%)   |
| Non-binary, Fluid                             | 5 (23%)  |
| <b>Sexual Orientation</b>                     |          |
| Gay, Queer, Same Gender Loving                | 12 (52%) |
| Bi-sexual, Pansexual                          | 5 (22%)  |
| Straight                                      | 6 (26%)  |
| <b>HIV Status</b>                             |          |
| HIV negative                                  | 14 (64%) |
| HIV positive                                  | 8 (36%)  |
| Not Likely                                    | 1 (4%)   |

\*One cisgender woman took part in the study who was referred for participation by her bisexual male partner.
