# Supplementary material
Source: PubMed Central journal article supplement (PMC9204779)
Supplement: NIHMS1791050-supplement-Table_2.pdf [file NIHMS1791050-supplement-Table_2.pdf]

**Supplementary Table 2.** Participant demographics from Project #3: *Ending the HIV Epidemic: Integrated Technology Solutions*

| <b>Focus Group Discussion Participants</b>         |          |
|----------------------------------------------------|----------|
| <b>(N=23)</b>                                      |          |
| North Carolina Resident                            | 22 (96%) |
| Currently in School                                | 16 (70%) |
| <b>Race/Ethnicity</b>                              |          |
| Hispanic                                           | 4 (17%)  |
| Black/ African American                            | 7(30%)   |
| White                                              | 12 (52%) |
| Asian                                              | 2 (9%)   |
| <b>Gender Identity</b>                             |          |
| Male                                               | 21 (91%) |
| Trans Female                                       | 2 (9%)   |
| <b>Health Insurance</b>                            |          |
| Private                                            | 12 (52%) |
| Government subsidized (Medicaid, Ryan White).      | 5 (22%)  |
| Unknown                                            | 6 (26%)  |
| None                                               | 1 (4%)   |
| <b>HIV Testing &amp; PrEP Usage</b>                |          |
| HIV negative/status unknown                        | 18 (78%) |
| Have had an HIV test                               | 16 (70%) |
| Ever/currently take PrEP                           | 2 (9%)   |
| <b>Impression of PrEP</b>                          |          |
| Extremely positive                                 | 6 (26%)  |
| Positive                                           | 10 (43%) |
| Unsure                                             | 7 (30%)  |
| <b>Likelihood of recommending PrEP to a friend</b> |          |
| Extremely likely                                   | 8 (35%)  |
| Likely                                             | 5 (22%)  |
| Unsure                                             | 9 (40%)  |
| Not Likely                                         | 1 (4%)   |

**Note.** Key informant interviews (KIIs) were also completed with 14 experts in HIV prevention and/or LGBT health and advocacy. Key informants did not provide socio-demographic information.
